# Supplementary material
Source: PubMed Central journal article supplement (PMC5127667)
Supplement: jci-126-88606-s001.pdf [file jci-126-88606-s001.pdf]

# Supplementary Figure 1

**A**

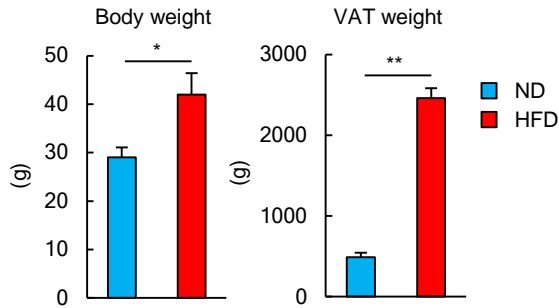

**B**

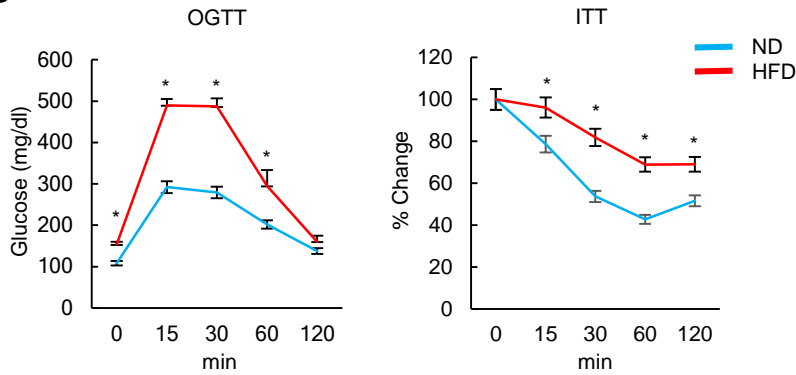

**C**

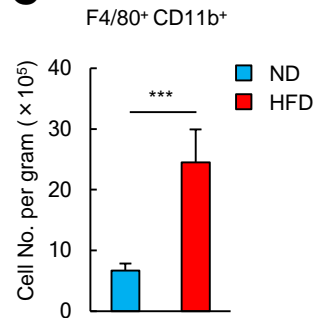

**D**

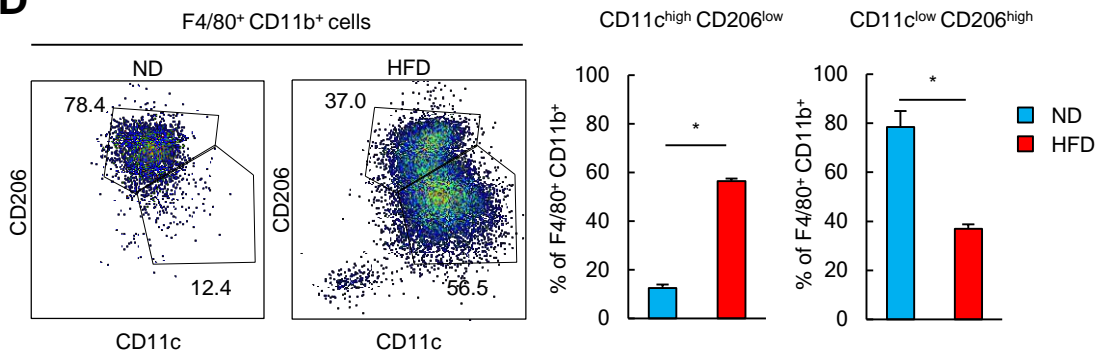

**E**

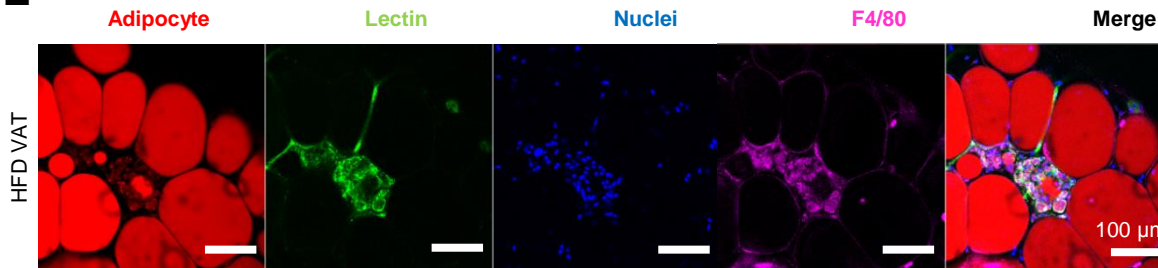

## Supplementary Figure 1. High fat diet caused VAT inflammation and metabolic dysfunction.

WT mice were fed a high-fat diet (HFD) beginning at 4 weeks of age for 14 weeks. Age-matched WT mice fed a normal diet (ND) were used as a control. **A.** Body and VAT weights (n = 6 mice per group). **B.** Oral glucose tolerance test (OGTT) and insulin tolerance test (ITT) (n = 6 mice per group). **C.** Quantitative analysis of macrophages (F4/80<sup>+</sup> CD11b<sup>+</sup>) in VAT (n = 6 mice per group). **D.** Analysis of macrophage polarization status. CD11c<sup>high</sup> CD206<sup>low</sup> macrophages vs. CD11c<sup>low</sup> CD206<sup>high</sup> macrophages (n = 6 mice per group). **E.** Crown-like structures in VAT. Adipocytes (BODIPY, red), Lectin (yellow), Nuclei (DAPI, blue) and F4/80 (pink). Scale bars, 100 μm. Graphs show mean ± SEM; \*P < 0.05; \*\*P < 0.001; \*\*\*P < 0.0001, by two-tailed Student's *t* test.

# Supplementary Figure 2

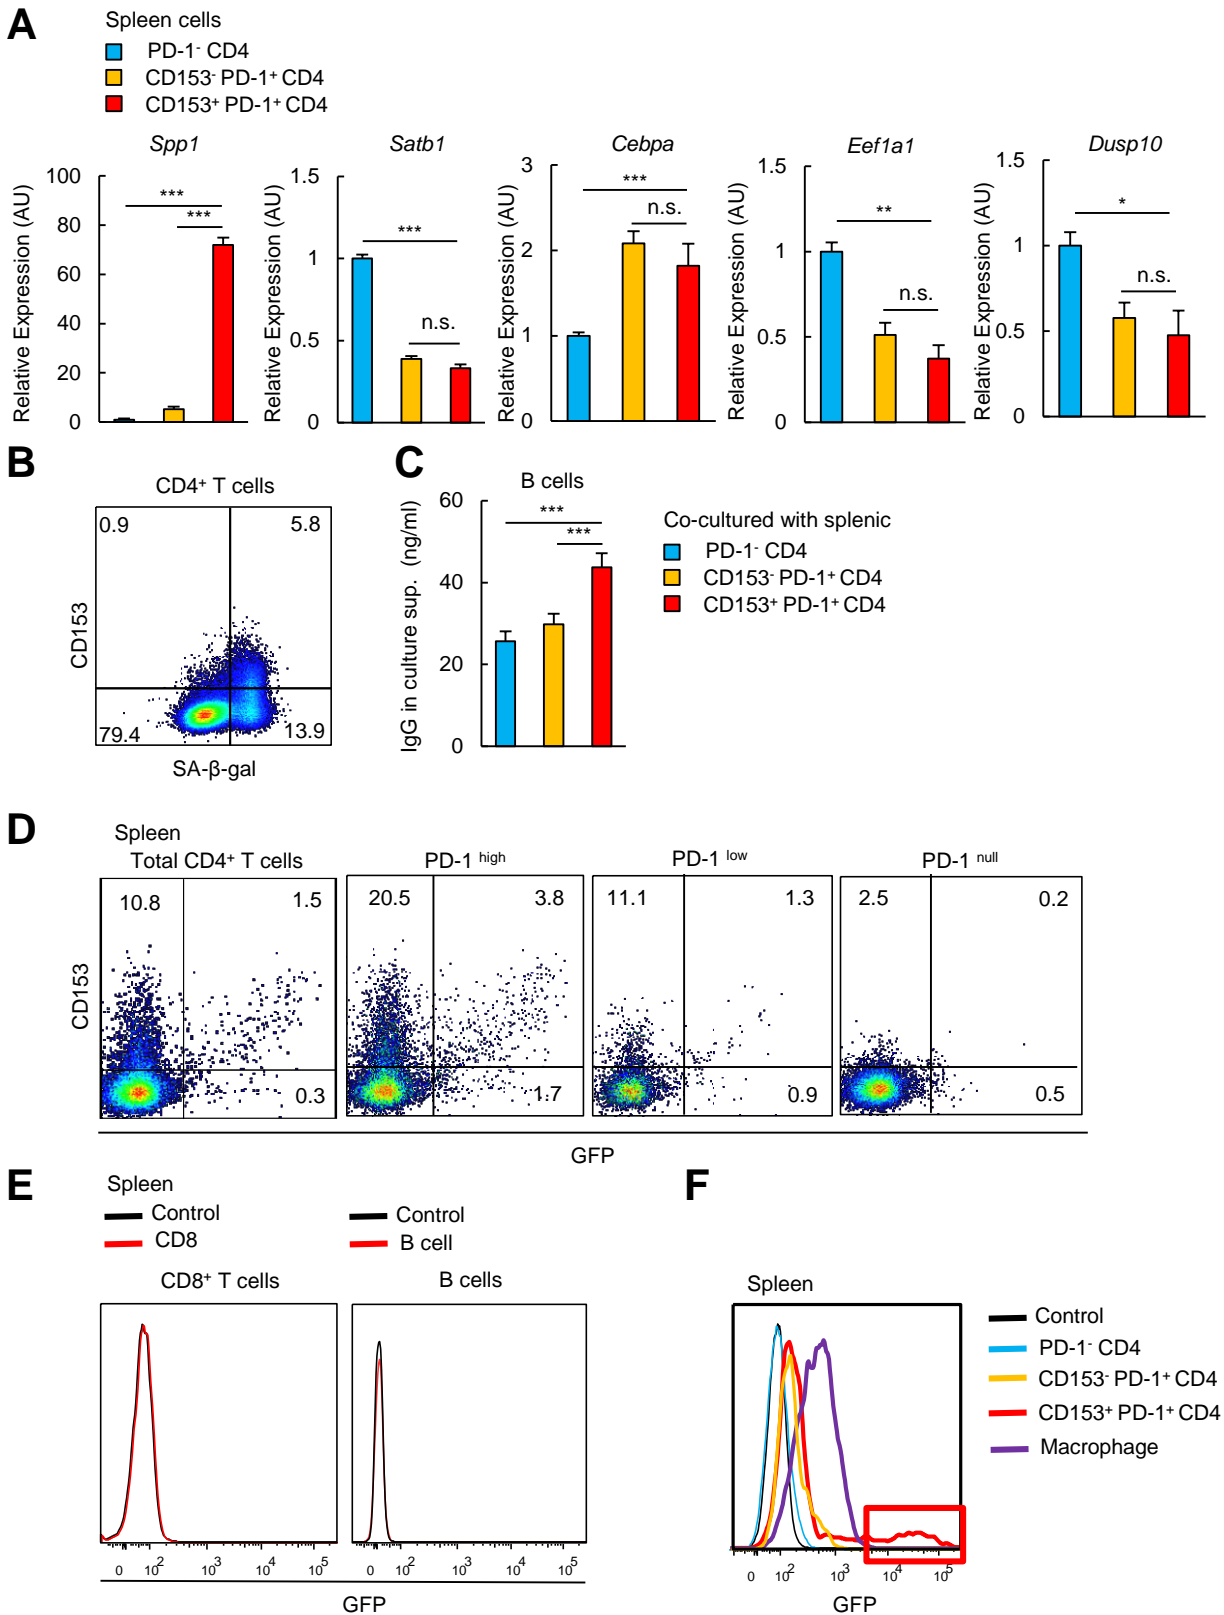

## Supplementary Figure 2. Characterization of splenic CD153<sup>+</sup> PD-1<sup>+</sup> CD4<sup>+</sup> T cells of HFD-fed obese mice.

PD-1<sup>-</sup>, CD153<sup>-</sup> PD-1<sup>+</sup>, and CD153<sup>+</sup> PD-1<sup>+</sup> CD4<sup>+</sup> T cells were separately isolated from spleen from WT mice fed a HFD. **A**. *Spp1*, *Satb1*, *Cebpa*, *Eef1a1*, and *Dusp10* expression were analyzed by real-time PCR analysis (n = 5 mice per group). **B**. A representative flow cytometric analysis demonstrated SA- $\beta$ -gal activity of PD-1<sup>+</sup> and PD-1<sup>-</sup> CD4<sup>+</sup> T cells (n = 3 mice per group). **C**. Cells were activated with anti-CD3/CD28 mAb in the presence of B cells from WT mice fed 18-week-old HFD for 7 days. IgG levels in the supernatant were determined by ELISA (n = 5 mice per group). **D**. A representative flow cytometric analysis of CD153<sup>+</sup> and EGFP-*Spp1* in PD-1<sup>high</sup>, PD-1<sup>low</sup>, PD-1<sup>null</sup> CD4<sup>+</sup> T cells obtained from spleen of EGFP-*Spp1* KI reporter mice fed a HFD. **E**. A representative flow cytometric analysis of CD153 and EGFP-*Spp1* in CD8<sup>+</sup> T cells and B cells obtained from VAT of EGFP-*Spp1* KI reporter mice fed a HFD. **F**. A representative flow cytometric analysis of EGFP-*Spp1* in indicated cells obtained from VAT of EGFP-*Spp1* KI reporter mice fed a HFD. Red box showed high fluorescence intensity of GFP in CD153<sup>+</sup> PD-1<sup>+</sup> CD4<sup>+</sup> T cells. Flow cytometric plots are representative of at least three independent experiments. Graphs show mean  $\pm$  SEM; Not significant (n.s.); \* P < 0.05; \*\* P < 0.001; \*\*\*P < 0.0001, by ANOVA followed by post hoc Bonferroni tests.

# Supplementary Figure 3

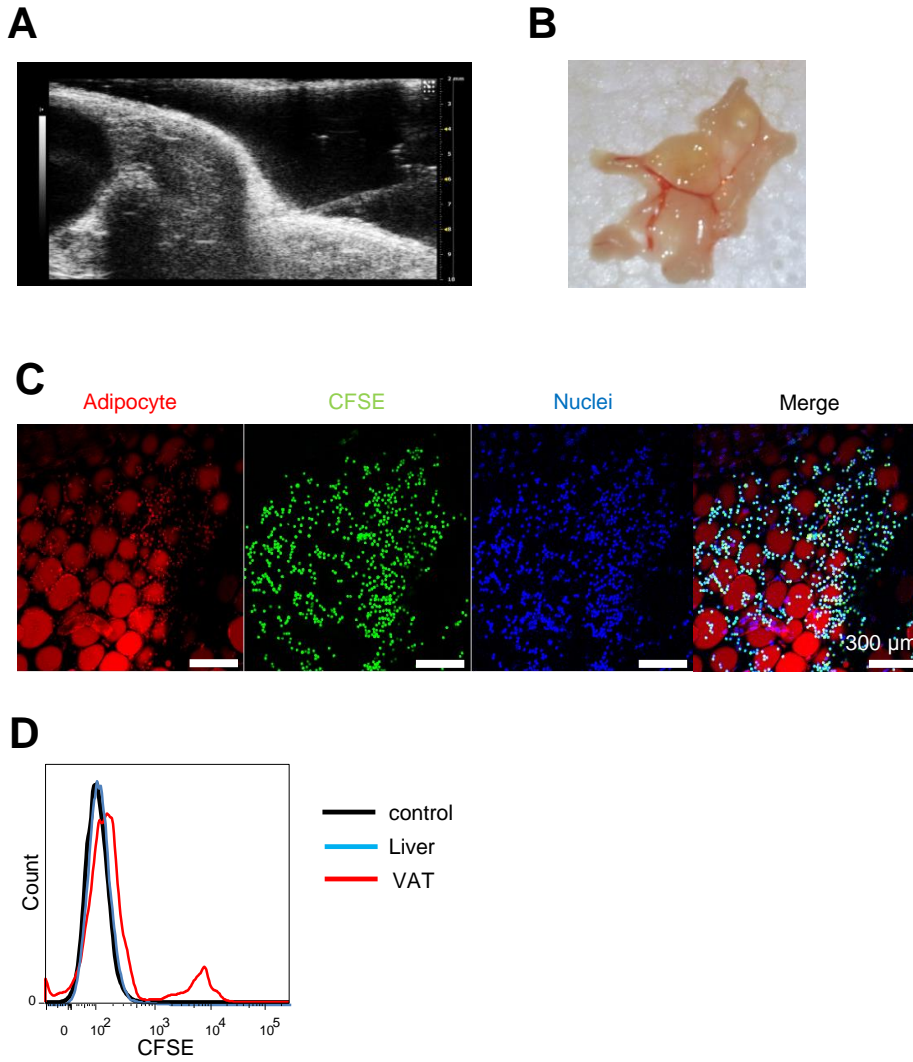

## Supplementary Figure 3. Ultrasound imaging-guided intra-adipose injections of cells.

CFSE-labeled CD4<sup>+</sup> T cells were directly injected into VAT. **A.** Ultrasound guidance allowed us to visualize the injection needle's path. **B.** VAT of recipient mice transplanted with CFSE-labeled CD4<sup>+</sup> T cells. **C.** Engraftment of injected CFSE-labeled CD4<sup>+</sup> T cells in VAT. **D.** Flow cytometric analysis of CFSE<sup>+</sup> cells within VAT and liver of recipient mice.

# Supplementary Figure 4

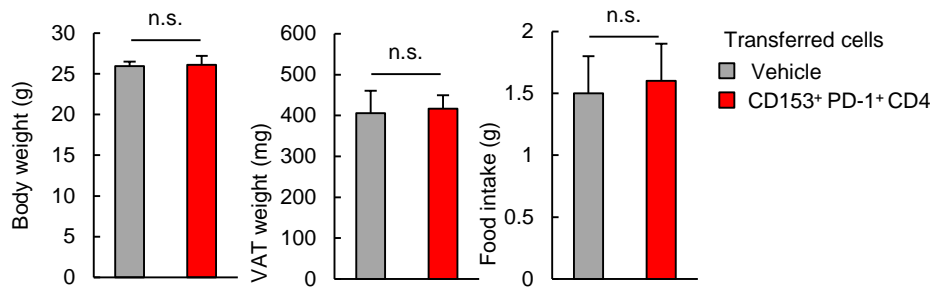

**Supplementary Figure 4. Adoptive transfer of CD153<sup>+</sup>PD-1<sup>+</sup>CD4<sup>+</sup> T cells induces VAT inflammation and insulin resistance in lean mice on a normal diet.**

Indicated cells were separately isolated from spleen from mice fed a HFD. Next,  $1 \times 10^5$  cells were transferred directly into VAT of individual recipient ND-fed lean mice 3 times per week for 2 weeks. ND-fed lean mice receiving vehicle (thermoreversible gelation polymer) were used as control group. **A.** Comparison of body weight, VAT weight, and food intake between mice transferred control regent or CD153<sup>+</sup> PD-1<sup>+</sup> CD4<sup>+</sup> T cells (n = 5 mice per group). Graphs show mean  $\pm$  SEM; Not significant (n.s.), by two-tailed Student's *t* test.

# Supplementary Figure 5

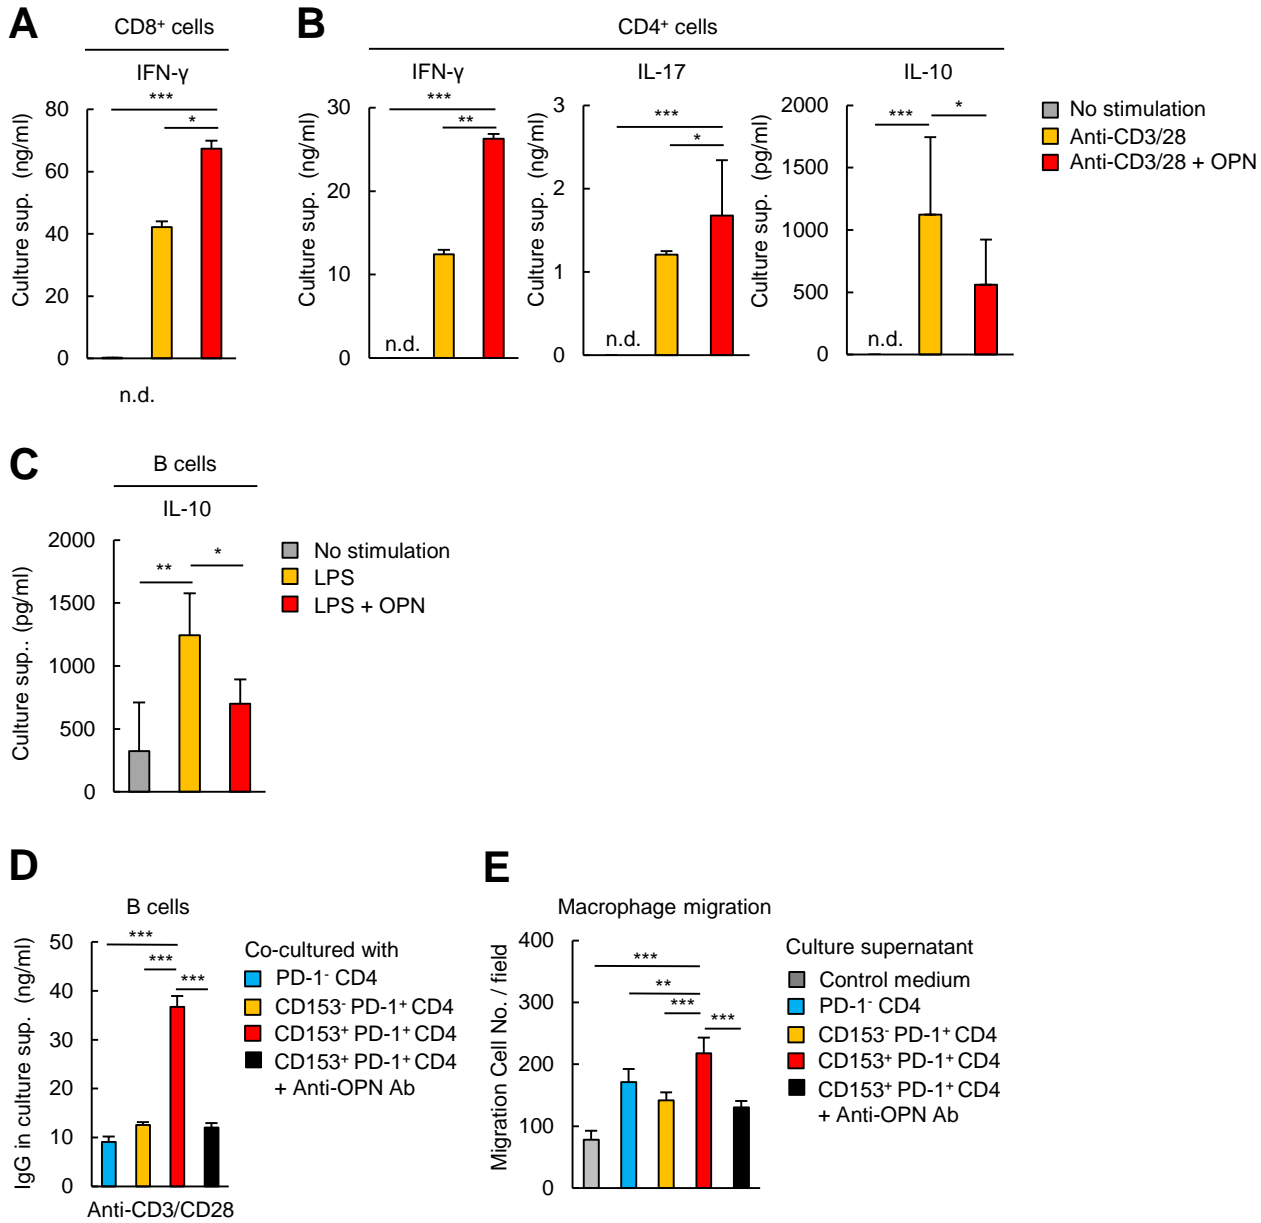

## Supplementary Figure 5. The effect of OPN on immune response.

**A.** CD8<sup>+</sup> T cells were cultured in the presence of coated anti-CD3/CD28 mAb in the presence or absence of recombinant OPN for 3 days. IFN- $\gamma$  in the culture supernatants was assessed by ELISA (n = 5 mice per group). **B.** CD4<sup>+</sup> T cells were cultured with coated anti-CD3/CD28 mAb in the presence or absence of recombinant OPN for 3 days. IFN- $\gamma$ , IL-17, and IL-10 in the culture supernatants were assessed by ELISA (n = 5 mice per group). **C.** B cells from VAT were isolated from WT mice fed a HFD and cultured for 2 days with LPS in the presence or absence of recombinant OPN (n = 5 mice per group). IL-10 in the culture supernatants was assessed by ELISA (n = 5 mice per group). PD-1<sup>-</sup>, CD153<sup>-</sup> PD-1<sup>+</sup>, and CD153<sup>+</sup> PD-1<sup>+</sup> CD4<sup>+</sup> T cells were separately isolated from VAT of WT mice fed a HFD. **D.** Cells were activated with anti-CD3/CD28 mAb with an anti-OPN antibody or control IgG in the presence of VAT B cells from HFD-fed mice for 10 days. IgG levels in the supernatant were determined by ELISA (n = 3 mice per group). **E.** Comparative analyses for macrophage migration assay. Isolated peritoneal macrophages were plated in Boyden chambers and treated with conditioned medium of stimulated CD4<sup>+</sup> T cells along with anti-OPN antibody or control IgG (n = 5 in each group). Graphs show mean  $\pm$  SEM; not detected (n.d.), \*P < 0.05; \*\*P < 0.001; \*\*\*P < 0.0001, by ANOVA followed by post hoc Bonferroni tests.

# Supplementary Figure 6

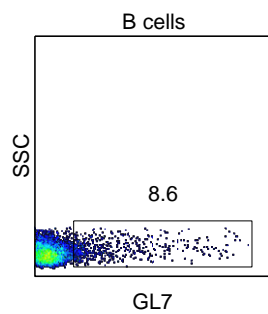

**Supplementary Figure 6. Obese VAT contained a significant proportion of B cells expressing GL7.**

WT or  $\mu$ MT mice were fed either a normal diet (ND) or high-fat diet (HFD) for 14 weeks. **A.** A representative flow cytometric analysis demonstrated the expression of GL7 in adipose B cells. Flow cytometric plots are representative of at least three independent experiments.

# Supplementary Figure 7

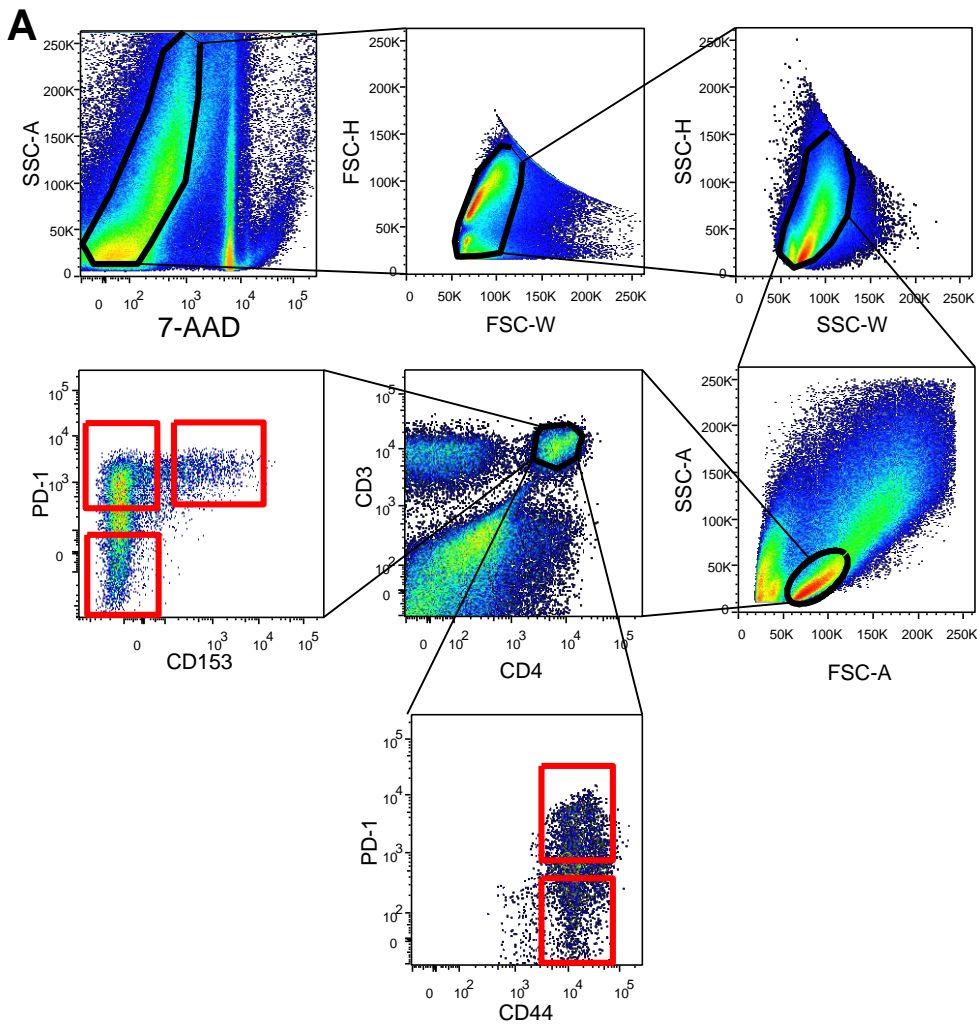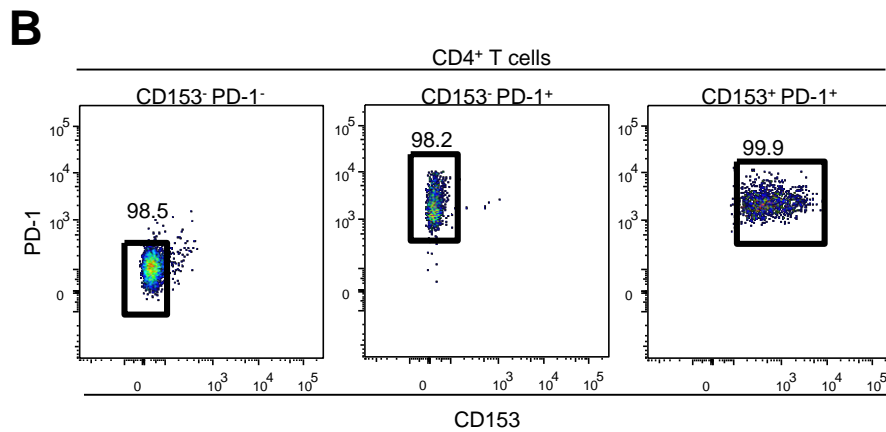

**Supplementary Figure 7. Gating strategy for VAT PD-1<sup>+</sup> CD4<sup>+</sup> T cells and CD153<sup>+</sup> PD-1<sup>+</sup> CD4<sup>+</sup> T cells.**

**A.** Gating strategy for VAT PD-1<sup>+</sup> CD4<sup>+</sup> CD44<sup>high</sup> T cells and CD153<sup>+</sup> PD-1<sup>+</sup> CD4<sup>+</sup> T cells. **B.** Purity of sorted PD-1<sup>-</sup>, CD153<sup>-</sup> PD-1<sup>+</sup>, and CD153<sup>+</sup> PD-1<sup>+</sup> CD4<sup>+</sup> T cells.
